# Supplementary material for: Development of a high-throughput assay for rapid screening of butanologenic strains
Source: PubMed Central journal article supplement (PMC5821843; doi:10.1038/s41598-017-18074-7), 2018-02-21
Supplement: 41598_2017_18074_MOESM1_ESM.pdf [file 41598_2017_18074_MOESM1_ESM.pdf]

1 **Supplementary Materials**

2 **Title: Development of a high-throughput assay for rapid screening of butanogenic strains**

3 **Authors:** Chidozie Victor Agu, Stella M. Lai, Victor Ujor, Pradip K. Biswas, Andy Jones, Venkat Gopalan and Thaddeus

4 Chukwuemeka Ezeji

5

6 **Table S1:** Overview of *Th* ADH n-butanol assay protocols highlighting improvements in protocol using microtiter plates.

| Step | Time-course assay protocol for initial velocity determination                                                                                                                                                                                   | End-point assay protocol for endpoint measurements using microtiter PCR plates                                                                                                                                                           |
|------|-------------------------------------------------------------------------------------------------------------------------------------------------------------------------------------------------------------------------------------------------|------------------------------------------------------------------------------------------------------------------------------------------------------------------------------------------------------------------------------------------|
| 1.   | Prepare reaction mix on ice as follows: 15 $\mu$ L unknown sample, 50 $\mu$ L CAPS (500 mM, pH 11.6), 12.5 $\mu$ L each of 10 mM DTT and 1 mM FeCl <sub>2</sub> , 30 $\mu$ L 2 mM NADP <sup>+</sup> , and 5 $\mu$ L <i>Th</i> ADH (10 $\mu$ M). | Prepare reagent master mixes. Master mix 1 = 25 $\mu$ L of 500 mM CAPS (pH 11.6), 6.25 $\mu$ L each of 10 mM DTT and 1 mM FeCl <sub>2</sub> . Master mix 2 = 15 $\mu$ L 2 mM NADP <sup>+</sup> and 1.5 $\mu$ L 10 $\mu$ M <i>Th</i> ADH. |
| 2.   | Label five 1.5-mL eppendorf tubes: 0, 20, 40, 60, or 80 s.                                                                                                                                                                                      | Aliquot 7.5 $\mu$ L of unknown samples and butanol standards (10 to 25 mM) + 1 $\mu$ L distilled water into microtiter PCR plate.                                                                                                        |
| 3.   | Aliquot 25- $\mu$ L reaction mix into each tube.                                                                                                                                                                                                | Add 37.5 $\mu$ L of master mix 1 and 16.5 $\mu$ L master mix 2.                                                                                                                                                                          |
| 4.   | Incubate each tube on a heat block for the time indicated.                                                                                                                                                                                      | Incubate at 80°C for 80 s. A thermocycler is used for this step.                                                                                                                                                                         |
| 5.   | After each incubation, quench reaction with 25 $\mu$ L 1 M NaOAc + 1 mM EDTA, pH 4.5.                                                                                                                                                           | Transfer reactions into wells of a flat-base microtiter plate.                                                                                                                                                                           |
| 6.   | Read Abs <sub>340</sub> immediately.                                                                                                                                                                                                            | Read absorbance at 340 nm.                                                                                                                                                                                                               |
| 7.   | Repeat steps 3 to 6 for each time point.                                                                                                                                                                                                        | Interpolate unknown concentration from standard curve.                                                                                                                                                                                   |
| 8.   | Prepare reaction mixes for each butanol standard as in (1) above.                                                                                                                                                                               |                                                                                                                                                                                                                                          |
| 9.   | Repeat steps 2 to 6 for each standard reaction mix.                                                                                                                                                                                             |                                                                                                                                                                                                                                          |
| 10.  | Transfer each 50 $\mu$ L reaction left on ice as in (6) above into wells of a flat-base microtiter plate.                                                                                                                                       |                                                                                                                                                                                                                                          |
| 11.  | Read absorbance at 340 nm.                                                                                                                                                                                                                      |                                                                                                                                                                                                                                          |
| 12.  | Interpolate unknown concentration from standard curve.                                                                                                                                                                                          |                                                                                                                                                                                                                                          |

8 **Table S2: List of primers and PCR protocols used to generate inserts.**

| S/N | Insert                          | Primers (5' to 3') and PCR strategy                                                                                                                                                                                                                                                                                                                                                                                                                                                                                                                                                                                                                                                                                                                                                                                                                                                                                                                                                                                                                                                                                      |
|-----|---------------------------------|--------------------------------------------------------------------------------------------------------------------------------------------------------------------------------------------------------------------------------------------------------------------------------------------------------------------------------------------------------------------------------------------------------------------------------------------------------------------------------------------------------------------------------------------------------------------------------------------------------------------------------------------------------------------------------------------------------------------------------------------------------------------------------------------------------------------------------------------------------------------------------------------------------------------------------------------------------------------------------------------------------------------------------------------------------------------------------------------------------------------------|
| 1.  | [ <i>dhaD1</i> + <i>gldA1</i> ] | <p>dhaD1-F: ATAGGGCCCAGGAGGTATCCATGGATGAGAAAAGCATTATTGTCCT<br/> dhaD1-R: ACCACCACCACCACC TTTACACATCCTCTTCTTTTCC<br/> gldA1-F: AAA GGTGGTGGTGGTGGTATGAGTTATAGTGTTTTTTTACCAAG<br/> gldA1-R1: TAAAAAATAAGAGTTACCATTATTAGACAGCTTTCACAGGC<br/> gldA1-R2:<br/> CGACCTCGAGAATTCACTATGAAACAATATTAATAAATAAGAGTTACCATTATTAGA</p> <p><b>PCR strategy:</b> (1) <i>dhaD1</i> was amplified from <i>C. pasteurianum</i> genomic DNA using nested PCR with primer pair dhaD1-F &amp; R (AT1 = 54°C, AT2 = 71°C) (2) <i>gldA1</i> was also amplified from <i>C. pasteurianum</i> genomic DNA with primer pair gldA1-F &amp; gldA1-R1 (AT1 = 54°C, AT2 = 66°C), then re-amplified the resulting amplicon with gldA1-F &amp; R2 (AT1 = 52°C, AT2 = 67°C). (3) <i>dhaD1</i> and <i>gldA1</i> amplicons were fused via two step SOE-PCR, Step 1: <i>dhaD1</i> and <i>gldA1</i> served as both primers and template (forward and reverse templating fragments, respectively) AT of overlap region = 59°C. In Step 2 SOE-PCR, the amplicon from step 1 was used as template for normal PCR using primers dhaD1-F and gldA1-R2 (AT = 67°C).</p> |
| 2.  | [ <i>gldA1</i> + <i>dhaK</i> ]  | <p>gldA1-F: ATAGGGCCCAGGAGGTATCCATGGATGAGTTATAGTGTTTTTTTACCAAG<br/> gldA1-R: ACCACCACCACCACC GACAGCTTTCACAGGCTCATTAC<br/> dhaK-F5: GTCGGTGGTGGTGGTGGTATGAAAAAGATAATAAATAAACCAG<br/> dhaK-R1: TAAAAAATAAGAGTTACCATTACTACTTTATAACCTCTGAAATC<br/> dhaK-R2:<br/> CGACCTCGAGAATTCACTATGAAACAATATTAATAAATAAGAGTTACCATTACTACT</p> <p><b>PCR strategy:</b> (1) <i>gldA1</i> was amplified from <i>C. pasteurianum</i> genomic DNA using nested PCR with primer set gldA1-F and gldA1-R (AT1 = 54°C, AT2 = 71°C), (2) <i>dhaK</i> was also amplified from <i>C. pasteurianum</i> genomic DNA using primer set dhaK-F5 and dhaK-R1 (AT1 = 50°C, AT2 = 62°C), then re-amplified using primers dhaK-F5 and dhaK-R2 (AT1 = 50°C, AT2 = 67°C). (3) Amplicons from (1) and (2) above were spliced by two-step SOE PCR. Step 1: AT = 63°C; Step 2: AT = 67°C.</p>                                                                                                                                                                                                                                                                        |
